# Supplementary material for: A Cell-Autonomous Oncosuppressive Role of Human RNASET2 Affecting ECM-Mediated Oncogenic Signaling
Source: MDPI journal article supplement (doi:10.3390/cancers11020255), 2019-02-22
Supplement: s1 [file s1]

# Supplementary Materials: A Cell-Autonomous Oncosuppressive Role of Human RNASET2 Affecting ECM-Mediated Oncogenic Signaling

Francesca Roggiani, Cristina Riva, Francesco Raspagliesi, Giovanni Porta, Roberto Valli,  
Roberto Taramelli, Francesco Acquati, Delia Mezzanzanica and Antonella Tomassetti

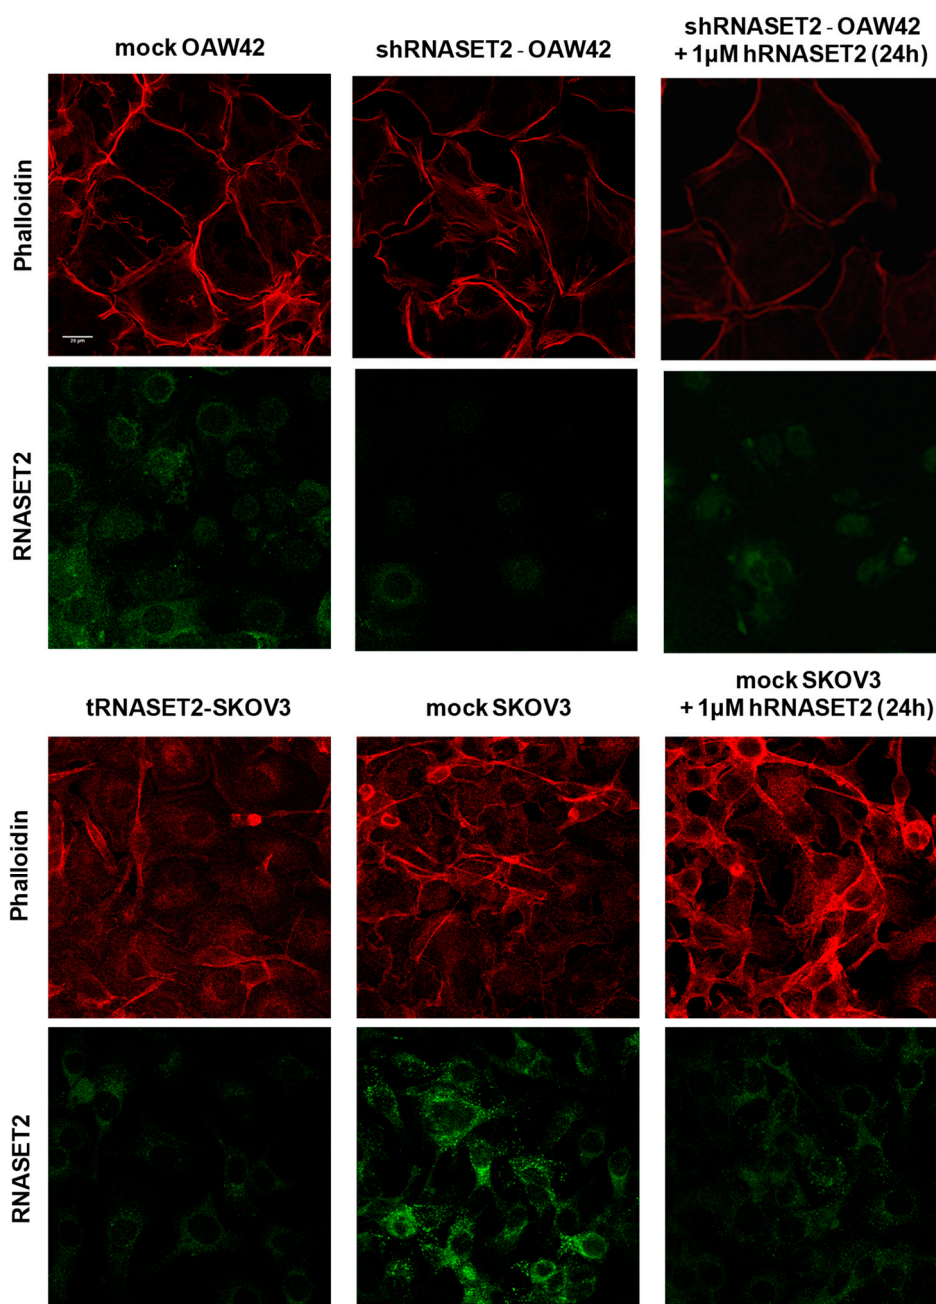

(a)

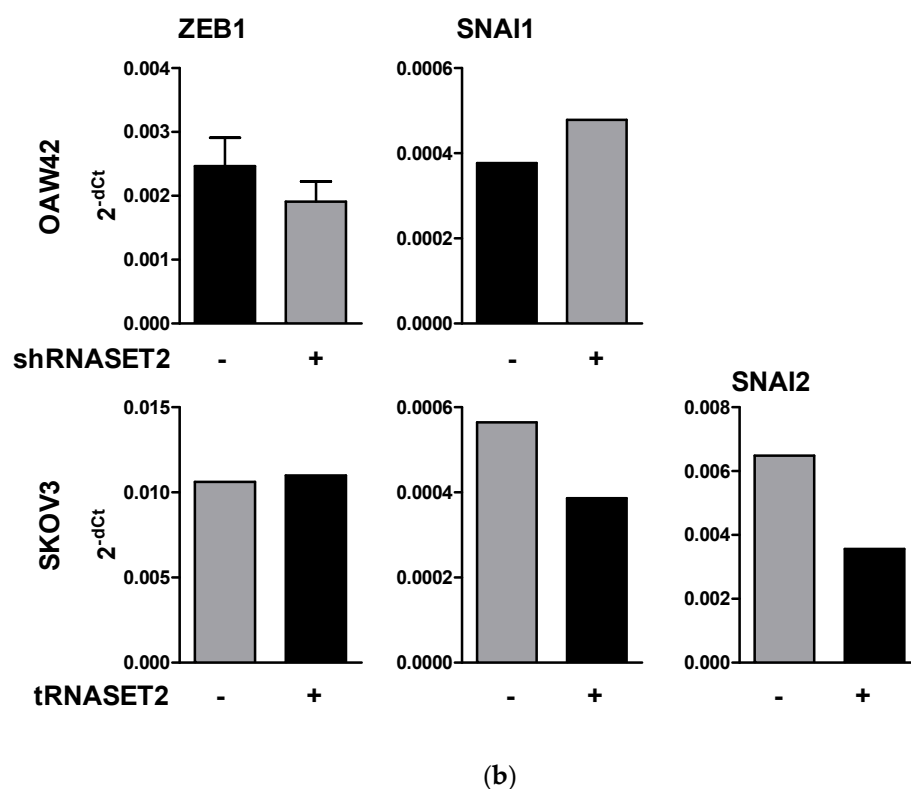

**Figure S1.** (a) Confocal IF analysis on fixed mock- or shRNA SET2-OAW42 and mock- or Table 2. cells treated or not with hRNA SET2 (1  $\mu$ M) for 24 h. Staining was performed with Abs reported on the left. (b) Real-time RT-PCR showing the transcript levels of ZEB1, SNAI1 and SNAI2 in mock/shRNA SET2-OAW42 and mock/tRNA SET2-SKOV3 cells. Results are presented as relative expression normalized to GAPDH mRNA levels from three experiments. Error bars, SD.

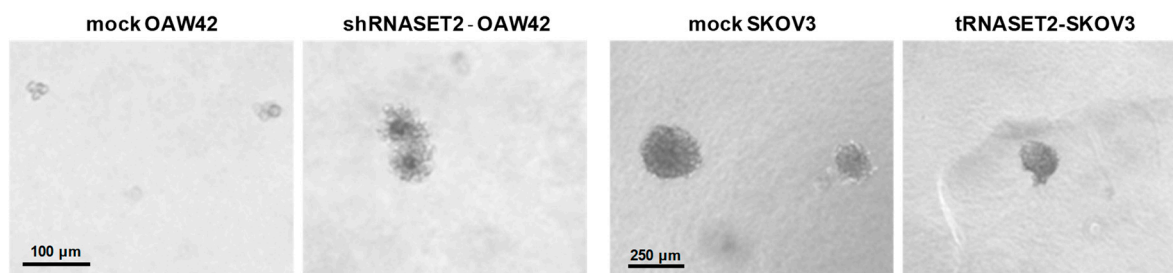

(a)

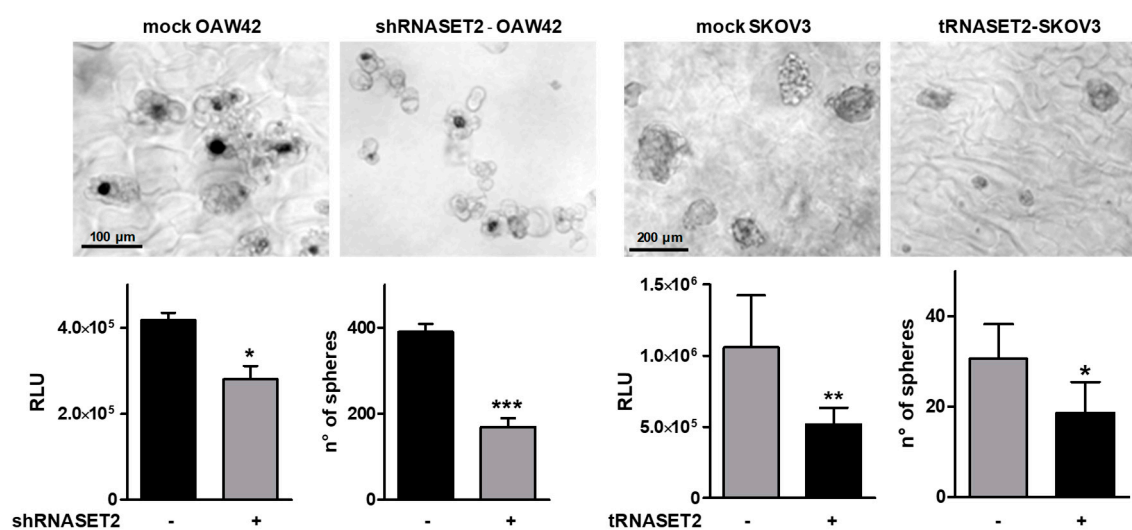

(b)

**Figure S2.** (a) Representative phase contrast images of the clonogenic assay described in Figure 3b. (b) Three-dimensional Algimatrix™ cultures of mock- or shRNASET2-OAW42 (left panel) and mock- or tRNASET2-SKOV3 cells (right panel) grown for 10 days. Upper panel: representative phase contrast images of cell spheres. Lower panel: graphs reporting the relative luminescence units (RLU) measured by CellTiter-Glo® Luminescent Cell viability assay (Promega) or as the number of spheres/well. Asterisks indicate significant values (\*  $p < 0.05$ , \*\*  $p < 0.01$  and \*\*\*  $p < 0.001$ ,). Error bars, SD.

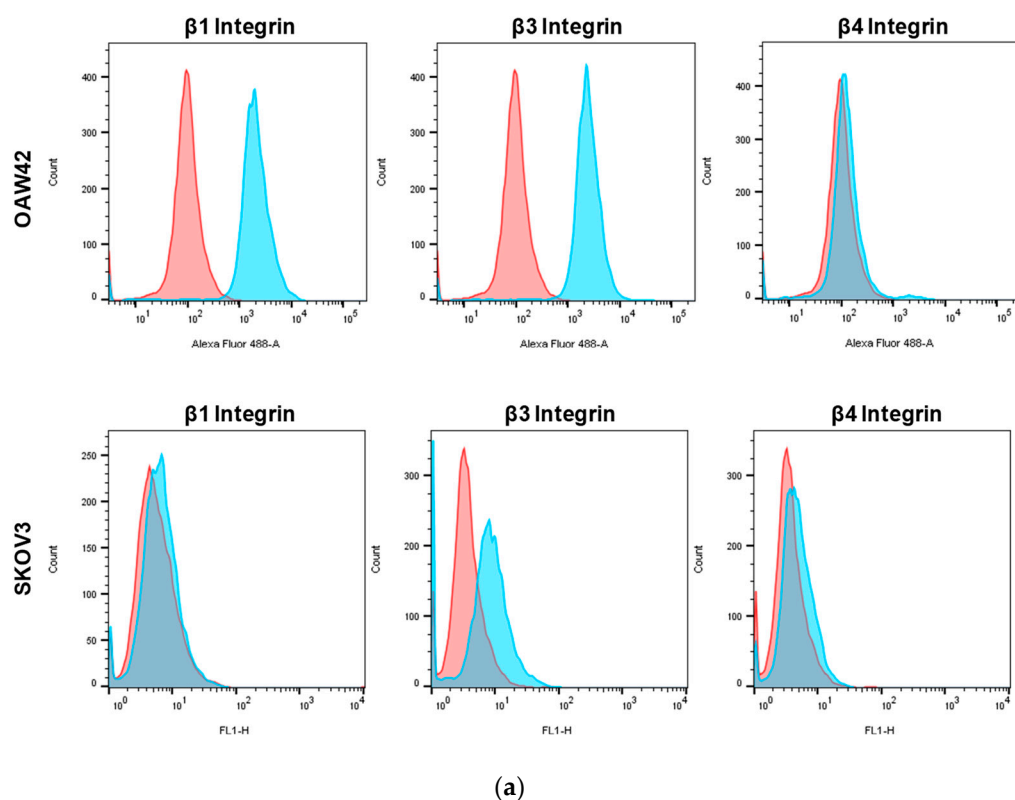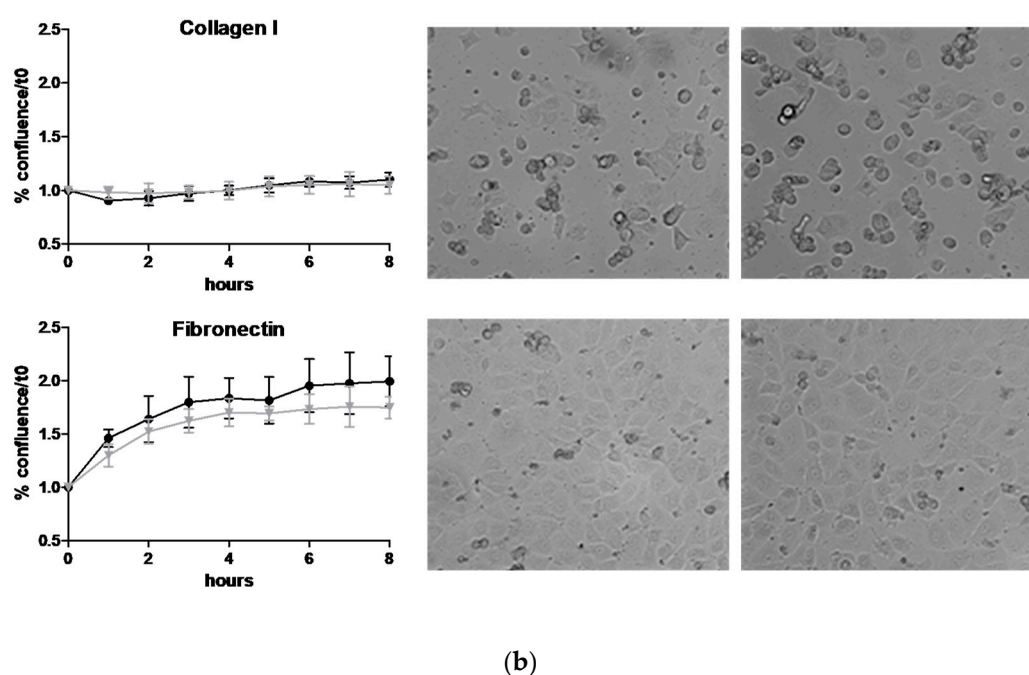

**Figure S3.** (a) FACS analysis performed with anti- $\beta 1$ ,  $\beta 3$  and  $\beta 4$  integrin Abs on OAW42 (upper panel) and SKOV3 (lower panel) cells. Secondary Abs were used as negative control. (b) Adhesion on ECM proteins of mock- (black line) and shRNA SET2 (grey line) OAW42 cells. Left panels: cells were monitored for up to 8 h, measuring cell confluence with JuLI™ Stage microscope and software (NanoEntek). Right panel: representative phase contrast imaged captured by the JuLI™ Stage microscope after 8 h.

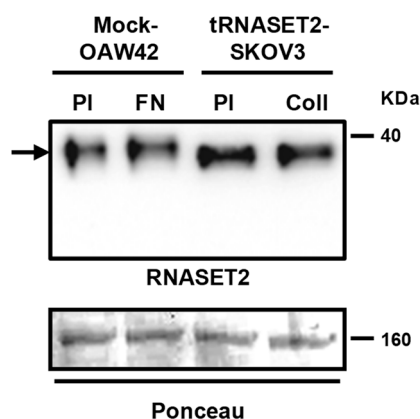

**Figure S4.** Upper panel: immunoblotting with anti-RNASET2 performed on three days conditioned media of RNASET2-expressing mock-OAW42 and tRNASET2-SKOV3 cells. The arrow highlights the 36 KDa band of secreted RNASET2. Lower panel: gel loading visualized as ponceau staining of the membrane.

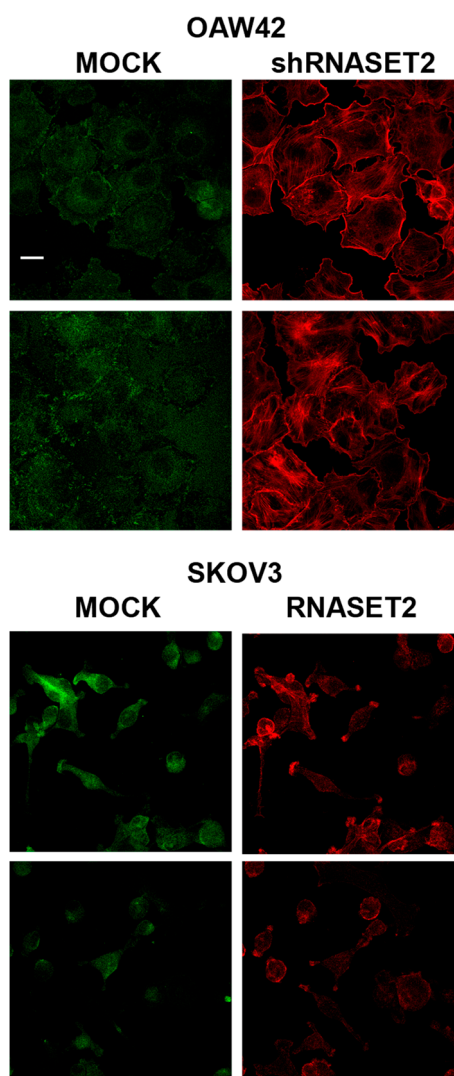

**Figure S5.** Images with single Ab of the confocal IF showed in Figure 4c. The white empty boxes highlight the images reported in Figure 4c. Green, anti-phosphorylated paxillin; red, phalloidin. Bar 20  $\mu$ m.

**Table S1.** List of used antibodies.

| Primary antibodies     | Source                   | Catalog #    | Dilution for IHC | Dilution for WB | Dilution for IF | Dilution for FACS |
|------------------------|--------------------------|--------------|------------------|-----------------|-----------------|-------------------|
| RNASET2                | [1]                      |              | 5 µg/mL          | 1:500           | 1:200           |                   |
| E-cadherin             | ThermoFisher Scientific  | 131700       |                  | 1:400           | 1:500           |                   |
| N-cadherin             | ThermoFisher Scientific  | 180224       |                  | 1:200           | 1:100           |                   |
| Vimentin               | Novocastra               | Ncl-l-vim-v9 |                  | 1:200           |                 |                   |
| Cytokeratin 8/18       | Novocastra               | Ncl-l-5d3    |                  | 1:200           |                 |                   |
| β-actin                | SIGMA-ALDRICH            | A2066        |                  | 1:400           |                 |                   |
| Phalloidin             | ThermoFisher Scientific  | A22283       |                  |                 | 1:1000          |                   |
| β1 Integrin            | Santa Cruz Biotechnology | Sc-6622      |                  |                 |                 | 10 µg/mL          |
| β3 Integrin            | Origene                  | TA320397     |                  |                 |                 | 10 µg/mL          |
| B4 Integrin            | Santa Cruz Biotechnology | Sc-13127     |                  |                 |                 | 10 µg/mL          |
| P-Paxillin (Tyr118)    | ThermoFisher Scientific  | 44722G       |                  |                 | 1:50            |                   |
| P-SRC (Tyr416)         | Cell Signaling           | 2101s        |                  | 1:500           |                 |                   |
| SRC                    | Santa Cruz Biotechnology | Sc-19        |                  | 1:500           |                 |                   |
| P-AKT (Ser473)         | Cell Signaling           | 9271s        |                  | 1:1000          |                 |                   |
| AKT                    | Cell Signaling           | 9272s        |                  | 1:500           |                 |                   |
| P-MAPK (Thr202/Tyr204) | Cell Signaling           | 9101s        |                  | 1:1000          |                 |                   |
| ERK 1/2                | Santa Cruz Biotechnology | Sc-154/Sc-93 |                  | 1:200           |                 |                   |

## References

- 1 Campomenosi, P.; Cinquetti, R.; Tallarita, E.; Lindqvist, C.; Raimondi, I.; Grassi, P.; Näsman, J.; Dell, A.; Haslam, S.M.; Taramelli, R.; et al. Comparison of the baculovirus-insect cell and *Pichia pastoris* heterologous systems for the expression of the human tumor suppressor protein RNASET2. *Biotechnol. Appl. Biochem.* **2011**, *58*, 39–49.

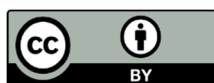

© 2019 by the authors. Licensee MDPI, Basel, Switzerland. This article is an open access article distributed under the terms and conditions of the Creative Commons Attribution (CC BY) license (<http://creativecommons.org/licenses/by/4.0/>).
